# Supplementary material for: Effective and Rapid Generation of Functional Neutrophils from Induced Pluripotent Stem Cells Using ETV2-Modified mRNA
Source: PubMed Central journal article supplement (PMC6915846; doi:10.1016/j.stemcr.2019.10.007), 2019-11-07
Supplement: mmc1.pdf [file mmc1.pdf]

**Stem Cell Reports, Volume 13**

**Supplemental Information**

**Effective and Rapid Generation of Functional Neutrophils from Induced  
Pluripotent Stem Cells Using ETV2-Modified mRNA**

**Vera S. Brok-Volchanskaya, David A. Bennin, Kran Suknuntha, Lucas C. Klemm, Anna  
Huttenlocher, and Igor Slukvin**

## **Supplementary Information**

V.S. Brok-Volchanskaya, D. A. Bennin, K. Suknuntha, L. Klemm, A. Huttenlocher, and I. Slukvin

Effective and rapid generation of functional neutrophils from induced pluripotent stem cells using ETV2 modified mRNA

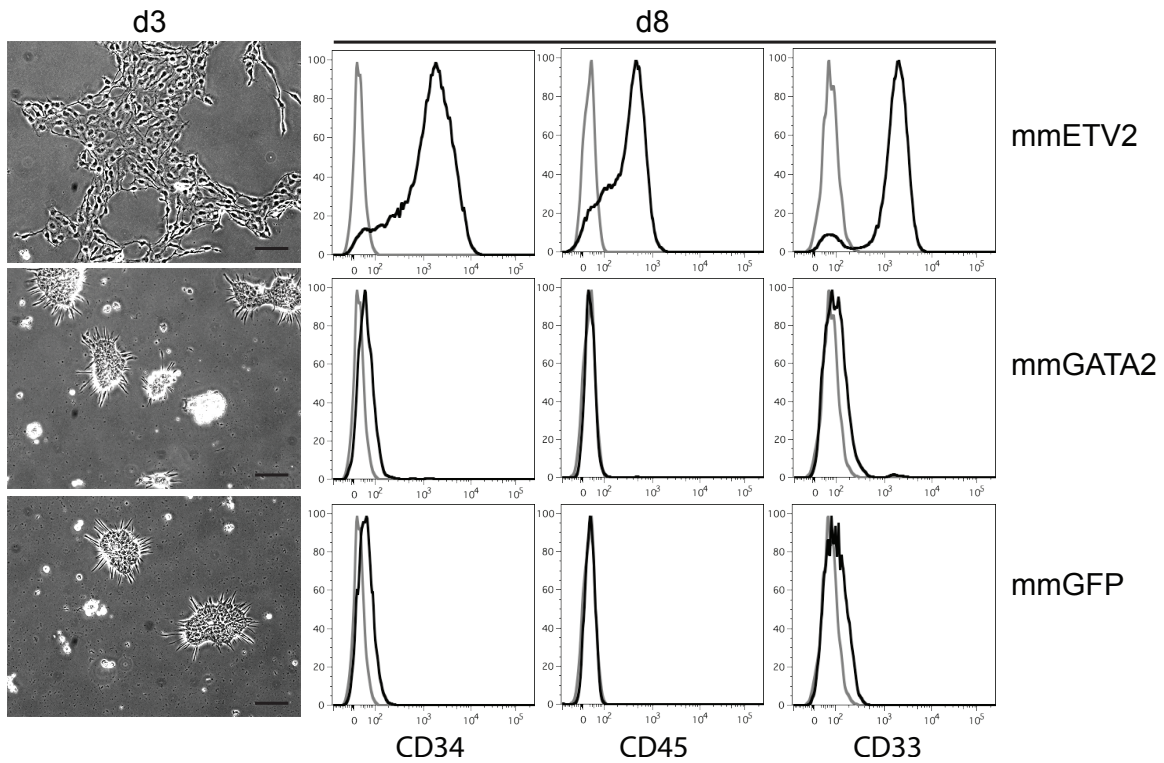

**Supplementary Figure 1. Induction of myeloid progenitors is specific for ETV2 modified mRNA.** iPSCs were transfected with ETV2, GATA2 or GFP modified RNA and cultured as outlined in Fig. 1A. Formation of CD34<sup>+</sup>CD33<sup>+</sup>CD45<sup>+</sup> myeloid progenitors was observed only in ETV2 mmRNA transfected cultures.

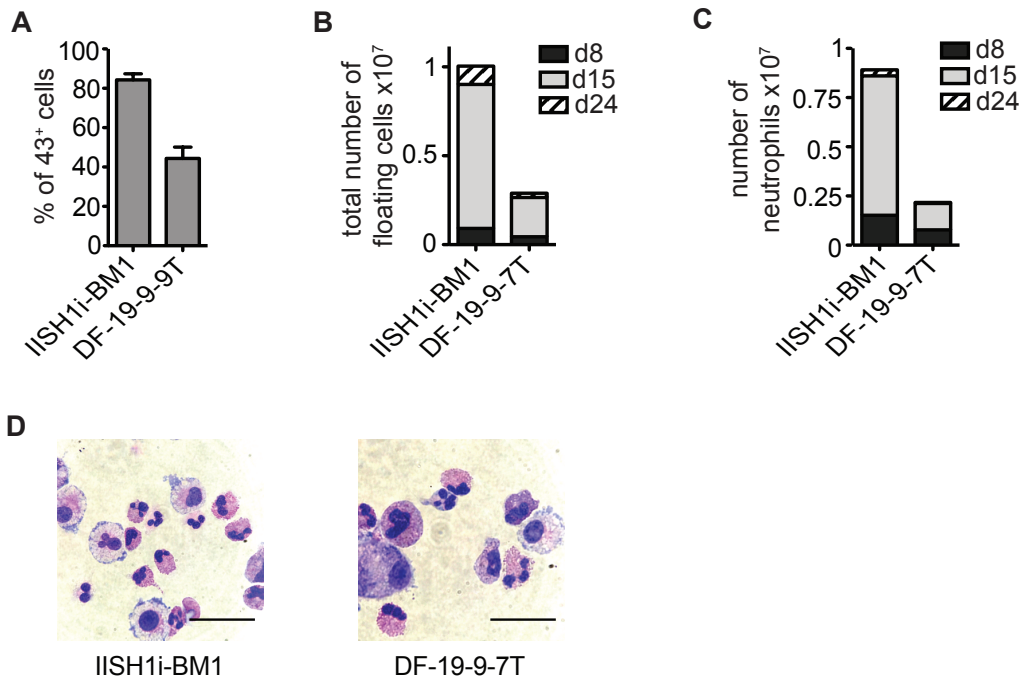

**Supplementary Figure 2. Neutrophil production from IISH1i-BM9 and DF-19-7T iPSC lines using ETV2 modified mRNA.** (A) Proportion of CD43<sup>+</sup> cells formed on day 8 of differentiation. (B) Total number of floating cells collected from differentiation cultures. (C) Total number of neutrophils produced in cultures. (D) Cytopspins showing the morphology of the generated neutrophils.

## Supplementary Video 1-4

Video 1-Fig 4a hiPSC derived neutrophils random migration.

Video 2-Fig 4a hiPSC derived neutrophils chemotaxing to fMLP.

Video 3-Fig 4a hiPSC derived neutrophils chemotaxing to IL8.

Video 4-Fig 4c hiPSC derived neutrophils migrating and phagocytosing

*Pseudomonas aeruginosa*.

## Supplementary Table 1. Antibodies used in this study.

| Antigen     | Conjugate  | Source            | Cat No.      |
|-------------|------------|-------------------|--------------|
| CD10        | BV510      | BD Biosciences    | 563032       |
| CD11b       | APC        | BD Biosciences    | 550019       |
| CD11b       | PE         | Life Technologies | 12-0118-42   |
| CD15        | BV711      | BD Biosciences    | 563142       |
| CD16        | FITC       | Life Technologies | 11-0168-42   |
| CD16        | APC        | Life technologies | 17-0168-42   |
| CD16        | PE-Cy7     | BD Biosciences    | 557744       |
| CD33        | PE-Cy5     | Biolegend         | 303406       |
| CD34        | PE-Vio770  | Miltenyi Biotec   | 130-100-844  |
| CD34        | FITC       | BD Biosciences    | 555821       |
| CD41a       | APC        | BD Biosciences    | 559777       |
| CD43        | VioBlue    | Miltenyi Biotec   | 130-097-373  |
| CD45        | PE         | Miltenyi Biotec   | 130-113-118  |
| CD45        | PE-Vio770  | Miltenyi Biotec   | 130-110-634  |
| CD45        | APC-Vio770 | Miltenyi Biotec   | 130-110-773  |
| CD66b       | PE         | BD Biosciences    | 561650       |
| CD144       | PE-Vio770  | Miltenyi Biotec   | 130-100-720  |
| CD182       | PE         | Invitrogen        | 12-1829-42   |
| CD235a      | APC        | BD Biosciences    | 551336       |
| Lactoferrin | PE         | Life Technologies | GIC206       |
| MPO         | FITC       | Invitrogen        | 11-1299-42   |
| Ghost red   | 780        | Tonbo Biosciences | 13-0865-T100 |
